# Supplementary material for: Colorimetric differentiation of arsenite and arsenate anions using a bithiophene sensor with two binding sites: DFT studies and application in food and water samples
Source: Royal Society of Chemistry journal article supplement (doi:10.1039/d4ay00768a), 2024-01-01
Supplement: d4ay00768a1.pdf [file d4ay00768a1.pdf]

## SUPPLEMENTARY INFORMATION

### Colorimetric differentiation of arsenite and arsenate anions using bithiophene sensor with two binding sites: DFT studies and application in food and water samples

Nagaraj K<sup>a,b</sup>, A. Nityananda Shetty<sup>a</sup>, Darshak R. Trivedi<sup>b\*</sup>

<sup>a</sup>= Material Science Laboratory, Department of Chemistry, National Institute of Technology Karnataka (NITK) Surathkal, Srinivasnagar - 575 025, Karnataka, India

<sup>b</sup>=Supramolecular Chemistry Laboratory, Department of Chemistry, National Institute of Technology Karnataka (NITK) Surathkal, Srinivasnagar - 575 025, Karnataka, India

\*Email: darshak\_rtrivedi@yahoo.co.in, darshakrtrivedi@nitk.edu.in, Phone No: +91-824-2473205, fax: +91 824 2474033 (Darshak R Trivedi)

#### Table of contents

**S1.** Materials and methods

**S2.** Synthesis and characterization of chemosensor N7R1

**S3.** Binding constant calculation

**S4.** Limit of detection (LOD) calculation

**Fig. S1** FT-IR spectrum of chemosensor N7R1

**Fig. S2** <sup>1</sup>H NMR spectrum of chemosensor N7R1

**Fig. S3** <sup>13</sup>C NMR spectrum of chemosensor N7R1

**Fig. S4** LC-MS spectrum of chemosensor N7R1

**Fig. S5** Color changes of chemosensor N7R1 ( $2 \times 10^{-5}$  M) in DMSO/H<sub>2</sub>O (9:1, v/v) on adding two equivalences of anions SCN<sup>-</sup>, S<sup>2-</sup>, P<sub>2</sub>O<sub>7</sub><sup>4-</sup>, N<sub>3</sub><sup>-</sup>, and SO<sub>3</sub><sup>2-</sup> ( $1 \times 10^{-2}$  M in water).

**Fig. S6** UV-Vis absorption spectra of chemosensor N7R1 in DMSO/H<sub>2</sub>O (9:1, v/v) in the presence of 2 equivalences of different anions.

**Fig. S7** Color changes of chemosensor N7R1 ( $2 \times 10^{-5}$  M) in DMSO/H<sub>2</sub>O (9:1, v/v) on adding two equivalences of various metal ions ( $1 \times 10^{-2}$  M in water).

**Fig. S8** Absorption intensity of N7R1 ( $2 \times 10^{-5}$  M) in DMSO/H<sub>2</sub>O (9:1, v/v) on adding two equivalences of arsenite ions ( $1 \times 10^{-2}$  M in water) in various intervals of time.

**Fig. S9** UV-Vis spectral response of (a) N7R1 and N7R1+ AsO<sub>2</sub><sup>-</sup> and (b) N7R1 and N7R1+ AsO<sub>4</sub><sup>3-</sup> in various percentages of water content in DMSO.

**Fig. S10** Color changes of chemosensor N7R1 ( $1 \times 10^{-5}$  M) in DMSO/H<sub>2</sub>O (7:3, v/v) on adding two equivalences of anions ( $1 \times 10^{-2}$  M in water).

**Fig. S11** Effects of absorbance in the presence of 3 equiv. of different anions in DMSO/H<sub>2</sub>O (7:3, v/v) solution of N7R1 ( $2 \times 10^{-5}$  M) Black bar: N7R1 + AsO<sub>2</sub><sup>-</sup> ion, Blue bar: N7R1 + AsO<sub>2</sub><sup>-</sup>+ competing anions.

**Fig. S12** B-H plot for N7R1–AsO<sub>2</sub><sup>-</sup> complex in DMSO/H<sub>2</sub>O (9:1, v/v).

**Fig. S13** B-H plot for N7R1–AsO<sub>4</sub><sup>3-</sup> complex in DMSO/H<sub>2</sub>O (9:1, v/v).

**Fig. S14** B-H plot for N7R1–AsO<sub>2</sub><sup>-</sup> complex in DMSO/H<sub>2</sub>O (7:3, v/v).

**Fig. S15** Calibration curve for N7R1–AsO<sub>2</sub><sup>-</sup> complex in DMSO/H<sub>2</sub>O (9:1, v/v)

**Fig. S16** Calibration curve for N7R1–AsO<sub>4</sub><sup>3-</sup> complex in DMSO/H<sub>2</sub>O (9:1, v/v)

**Fig. S17** Calibration curve for N7R1–AsO<sub>2</sub><sup>-</sup> complex in DMSO/H<sub>2</sub>O (7:3, v/v).

**Fig. S18** LC- MS spectrum of N7R1- AsO<sub>2</sub><sup>-</sup> complex in negative mode.

**Fig. S19** A linear calibration plot of N7R1–AsO<sub>2</sub><sup>-</sup> vs. the amount of AsO<sub>2</sub><sup>-</sup> ions for the quantitative analysis of milk, honey and water samples.

## S1. Materials and methods

The chemicals, anions, and solvents used in the study were procured from Sigma-Aldrich and TCI and used without further purification. <sup>1</sup>H NMR and <sup>13</sup>C NMR spectra of the synthesized chemosensor were recorded using JEOL (400 MHz) NMR spectrometer. Infrared spectrum was recorded on Bruker- alpha FT-IR spectrometer with a resolution of 4 cm<sup>-1</sup>. UV-Vis spectral studies were performed using Analytikjena Specord S600 spectrometer in a 3.5 mL glass cuvette with a path length of 1 cm. The cyclic voltammograms were recorded on an Ivium electrochemical workstation with a scan rate of 20 mV/s and a potential range of -1.5 to +1.5 V. Mass spectrum of the chemosensor was recorded using Xevo QToF, Waters mass spectrometer. The melting point of the synthesized product was recorded using Stuart-SMP3 melting point apparatus.

## S2. Synthesis and characterization of chemosensor N7R1

*Synthesis of chemosensor N7R1 (4,4'-(((1E,1'E)-[2,2'-bithiophene]-5,5'-diylbis(methanylylidene))bis(hydrazin-1-yl-2-ylidene))dibenzonitrile)*

Chemosensor N7R1 was prepared using a Schiff base reaction between 2,2'-bithiophene 5,5'-dicarboxaldehyde (200 mg, 0.899 mmol) and 4-cyanophenylhydrazine (305 mg, 1.799 mmol). Both were dissolved in 20 mL of ethanol. After adding 2–3 drops of glacial acetic acid, the mixture was refluxed for 3 h at 90 °C. The solid formed was filtrated and purified by ethanol wash. Yield: 86%, Melting point: 269 °C. FT-IR (ATR) (cm<sup>-1</sup>): 3268.36 (N-H), 2204.55 (C≡N), 1600.85 (C=N), <sup>1</sup>H NMR (DMSO-d<sub>6</sub>, 400 MHz, Me<sub>4</sub>Si): 11.074 (s, 2H), 8.130 (s, 2H), 7.660–7.640 (d, 4H), 7.376–7.372 (d, 2H), 7.309 (s, 2H), 7.111–7.091 (d, 4H). <sup>13</sup>C NMR (DMSO-d<sub>6</sub>, 100 MHz): 148.54, 139.83, 137.06, 135.40, 134.20, 130.05, 125.45, 120.54, 112.56, 100.00. Mass (LC-MS): m/z calculated for C<sub>24</sub>H<sub>16</sub>N<sub>6</sub>S<sub>2</sub>: 452.55 Obtained: 451.08 [M-H]<sup>+</sup>

## S3. Binding constant calculation

The binding constants of the chemosensor with the particular anions were calculated from UV-Vis titrations. The fitting of the graph between the 1/(A-A<sub>0</sub>) vs. 1/[Arsenite]<sup>n</sup> provides the straight line, and using Benesi-Hildebrand (B-H) equation (Eq. 1), the binding constants can be calculated.

$$\frac{1}{A - A_0} = \frac{1}{A_{max} - A_0} + \frac{1}{K[I^-]^n(A_{max} - A_0)} \quad (\text{Eq. 1})$$

where K is the binding constant,  $[I^-]$  is the anion concentration, n is the stoichiometric ratio, and A is absorbance.

#### S4. Limit of detection (LOD) calculation

A linearity graph between absorbance and the concentration of anion was used to calculate LOD. The equation used is

$$LOD = \frac{3 \times \sigma}{S} \quad (\text{Eq. 2})$$

where S is the slope and  $\sigma$  is the standard deviation of the calibration curve.

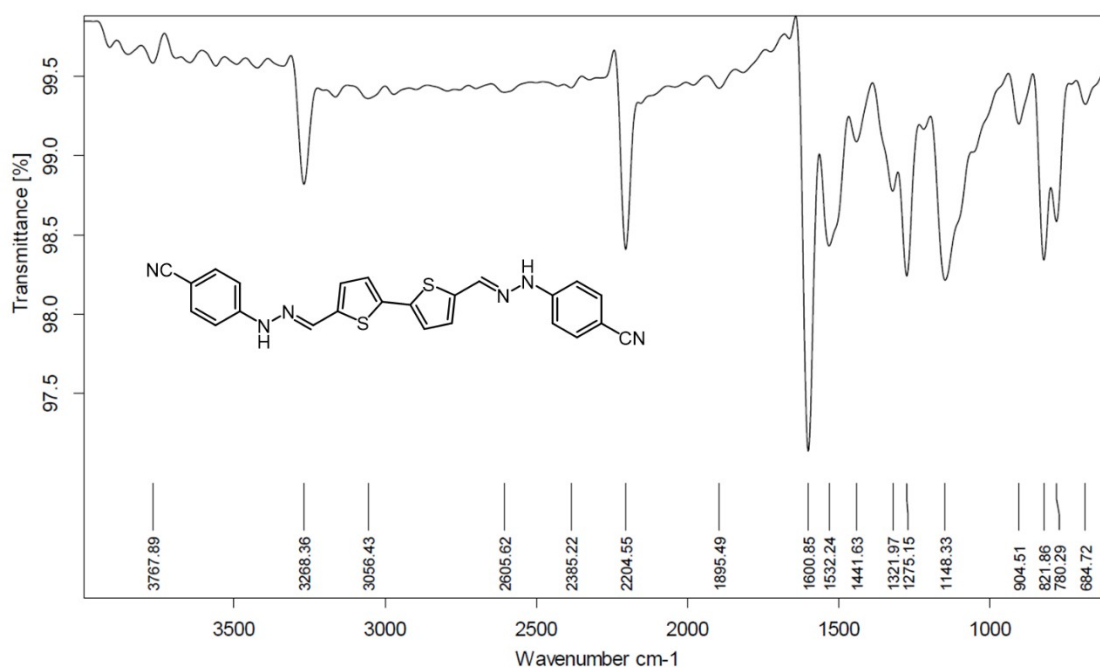

**Fig. S1** FT-IR spectrum of chemosensor N7R1.

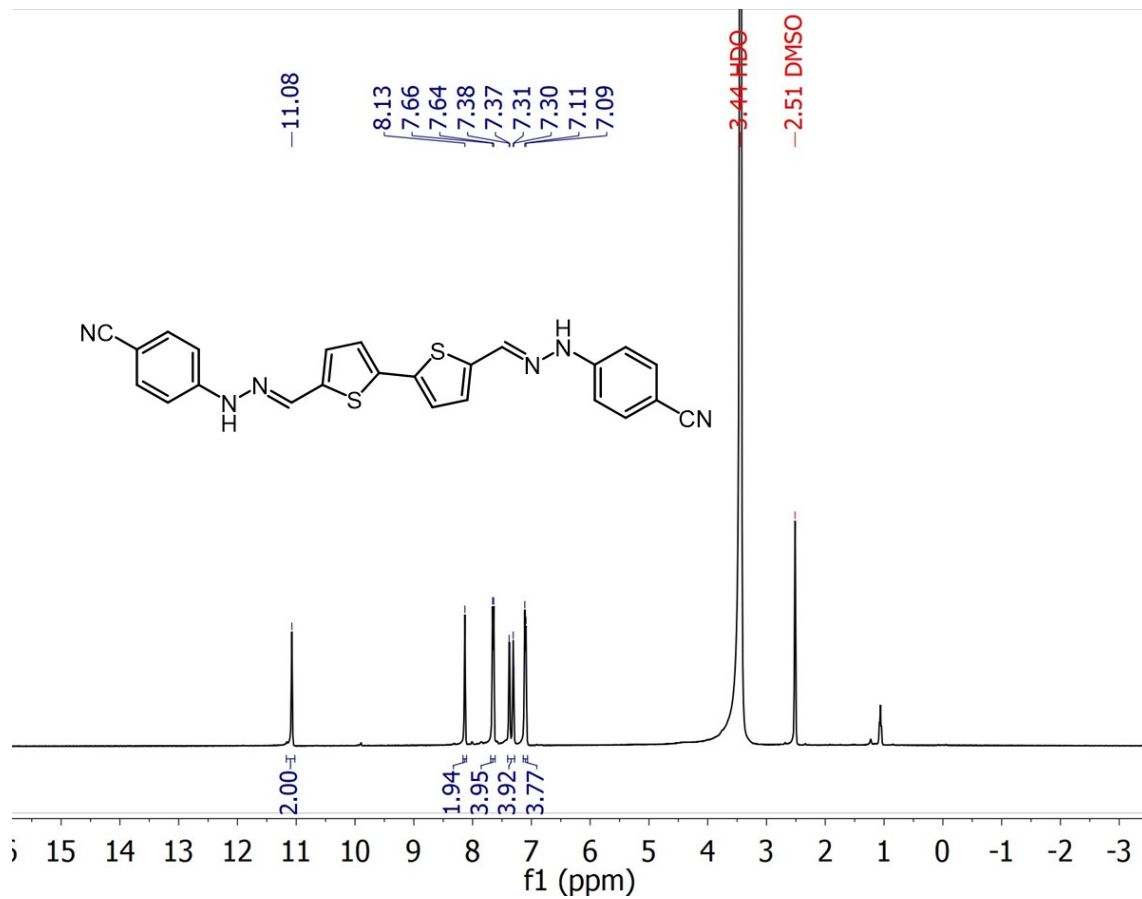

**Fig. S2**  $^1\text{H}$  NMR spectrum of chemosensor N7R1.

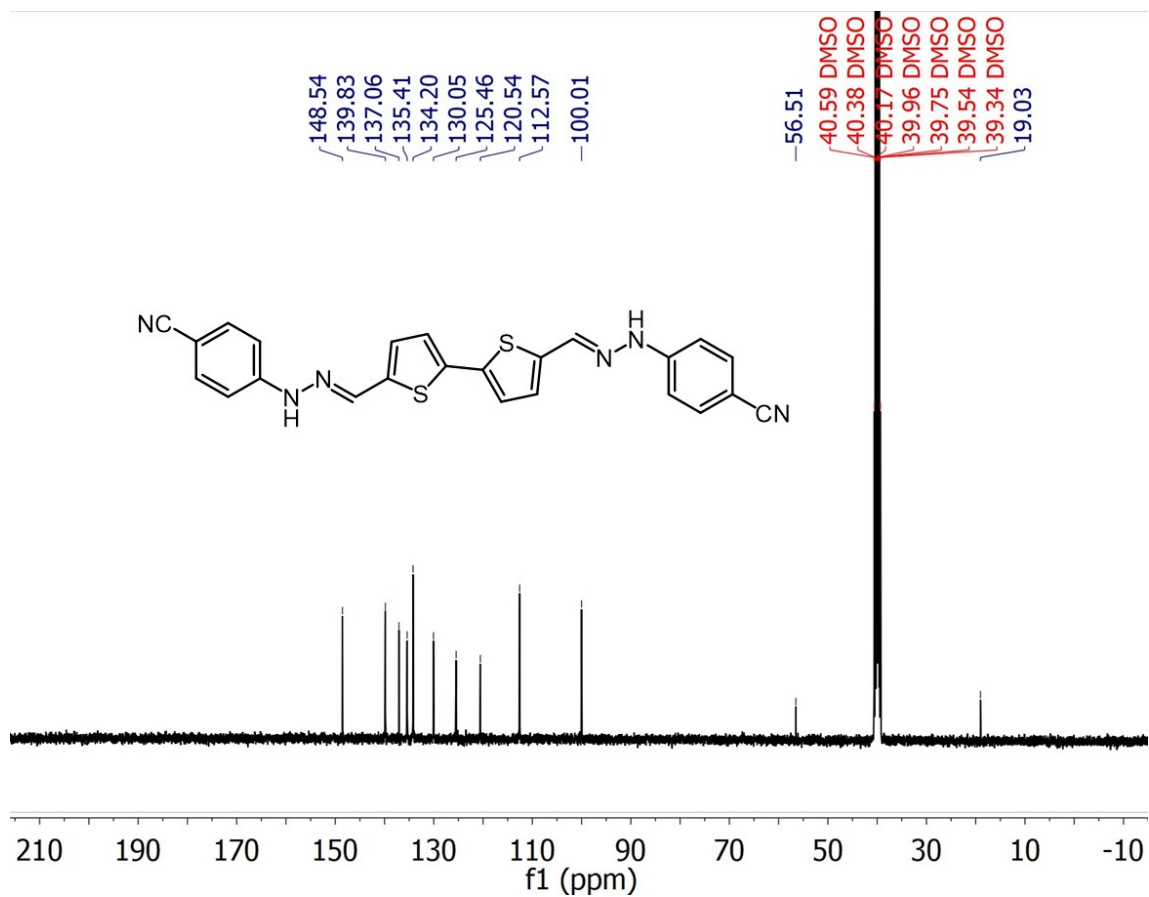

**Fig. S3** <sup>13</sup>C NMR spectrum of chemosensor N7R1.

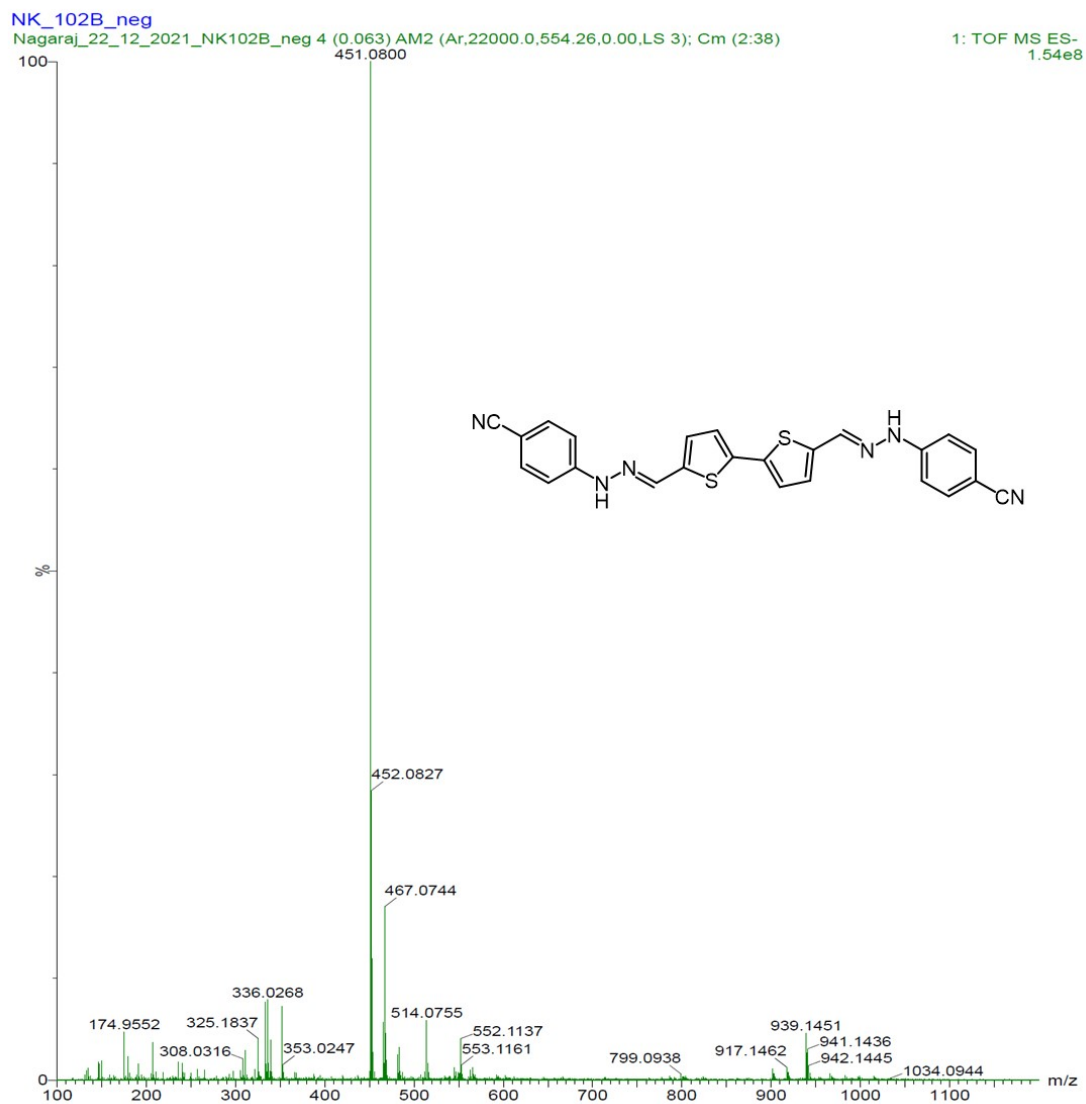

**Fig. S4** LC-MS spectrum of chemosensor N7R1.

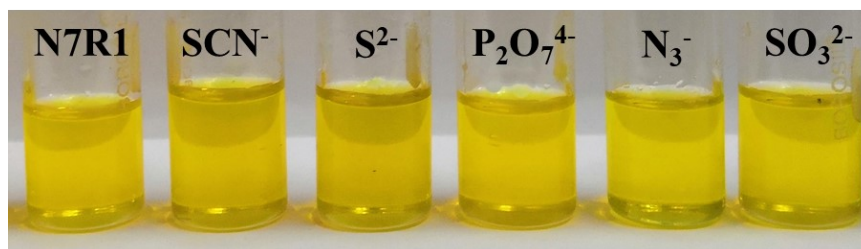

**Fig. S5** Color changes of chemosensor N7R1 ( $2 \times 10^{-5}$  M) in DMSO/H<sub>2</sub>O (9:1, v/v) on adding two equivalences of anions SCN<sup>-</sup>, S<sup>2-</sup>, P<sub>2</sub>O<sub>7</sub><sup>4-</sup>, N<sub>3</sub><sup>-</sup>, and SO<sub>3</sub><sup>2-</sup> ( $1 \times 10^{-2}$  M in water).

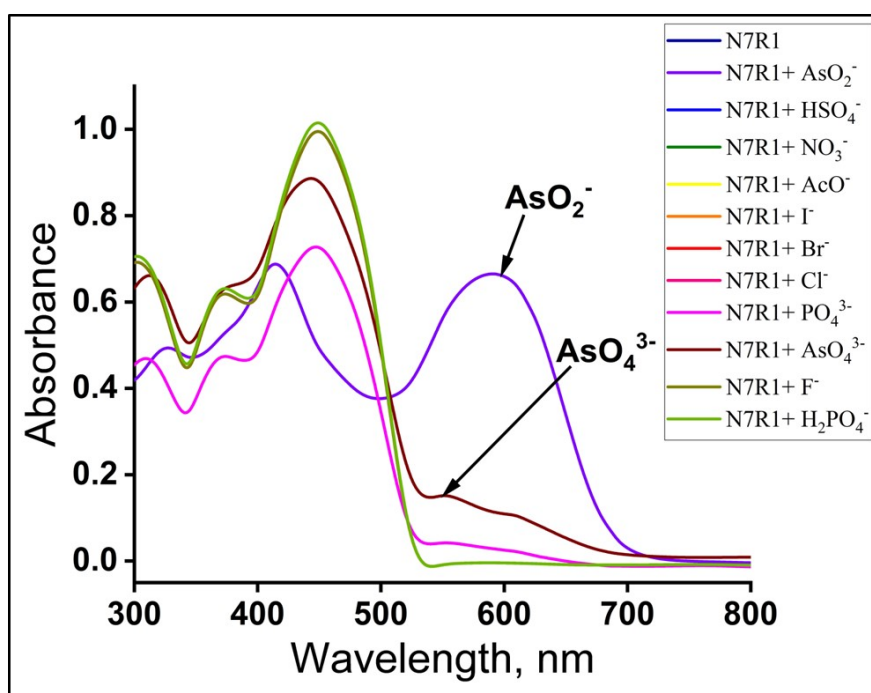

**Fig. S6** UV-Vis absorption spectra of chemosensor N7R1 in DMSO/H<sub>2</sub>O (9:1, v/v) in the presence of 2 equivalents of different anions.

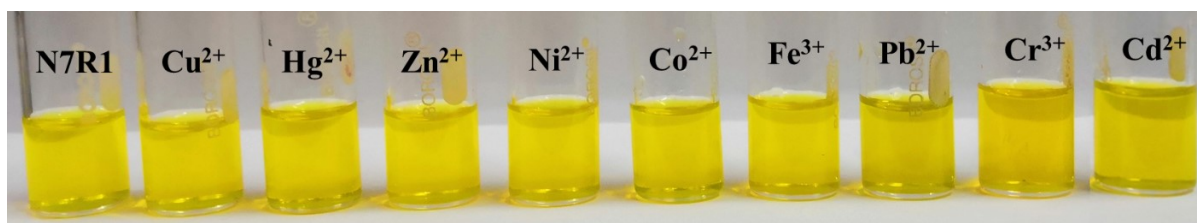

**Fig. S7** Color changes of chemosensor N7R1 ( $2 \times 10^{-5}$  M) in DMSO/H<sub>2</sub>O (9:1, v/v) on adding two equivalents of various metal ions ( $1 \times 10^{-2}$  M in water).



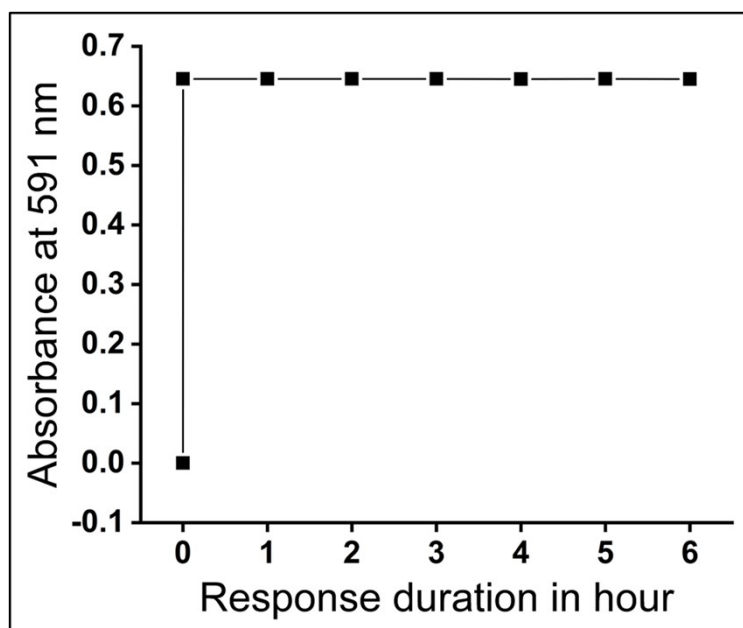

**Fig. S8** Absorption intensity of N7R1 ( $2 \times 10^{-5}$  M) in DMSO/H<sub>2</sub>O (9:1, v/v) on adding two equivalences of arsenite ions ( $1 \times 10^{-2}$  M in water) in various intervals of time.

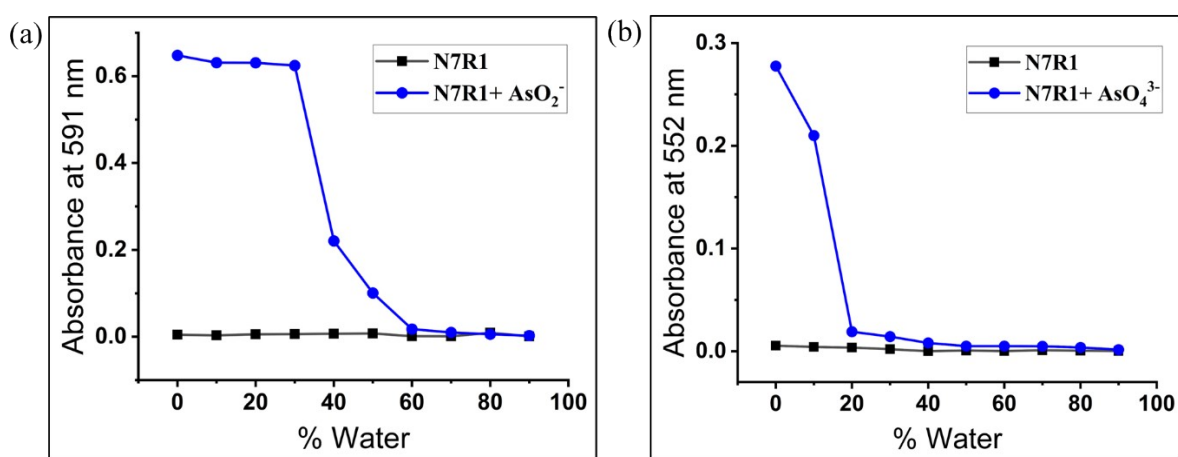

**Fig. S9** UV-Vis spectral response of (a) N7R1 and N7R1+ AsO<sub>2</sub><sup>-</sup> and (b) N7R1 and N7R1+ AsO<sub>4</sub><sup>3-</sup> in various percentages of water content in DMSO.

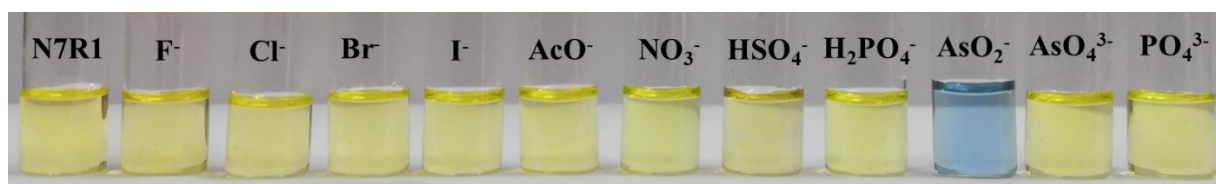

**Fig. S10** Color changes of chemosensor N7R1 ( $1 \times 10^{-5}$  M) in DMSO/H<sub>2</sub>O (7:3, v/v) on adding two equivalences of anions ( $1 \times 10^{-2}$  M in water).

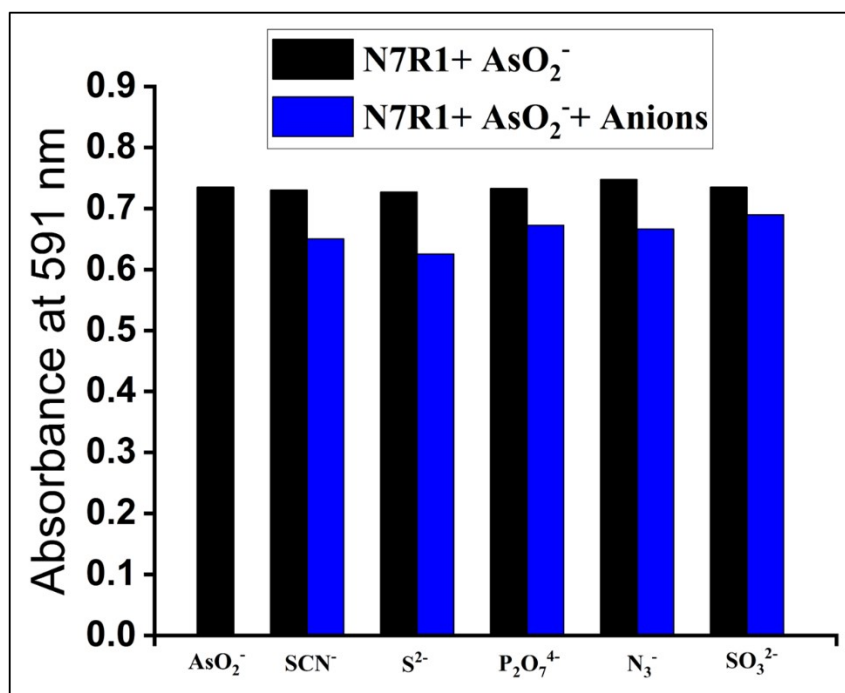

**Fig. S11** Effects of absorbance in the presence of 3 equiv. of different anions in DMSO/H<sub>2</sub>O (7:3, v/v) solution of N7R1 ( $2 \times 10^{-5}$  M) Black bar: N7R1 + AsO<sub>2</sub><sup>-</sup> ion, Blue bar: N7R1 + AsO<sub>2</sub><sup>-</sup>+ competing anions.

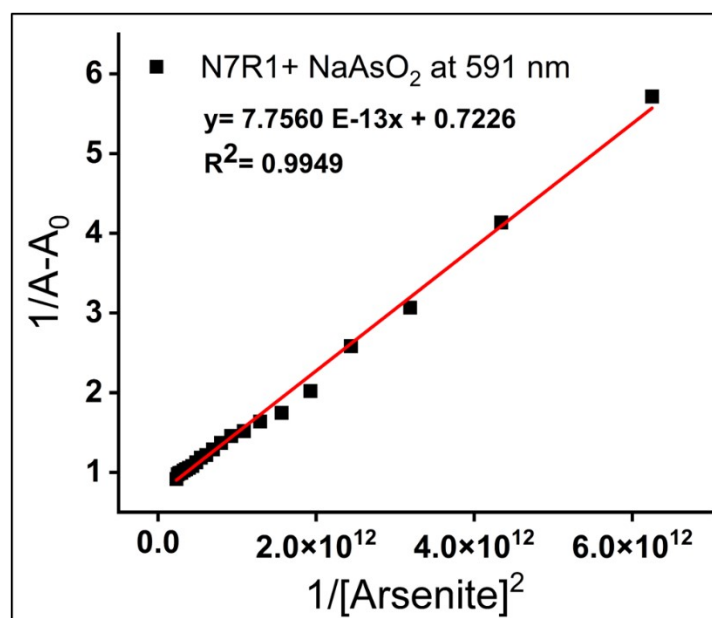

**Fig. S12** B-H plot for N7R1–AsO<sub>2</sub><sup>-</sup> complex in DMSO/H<sub>2</sub>O (9:1, v/v).

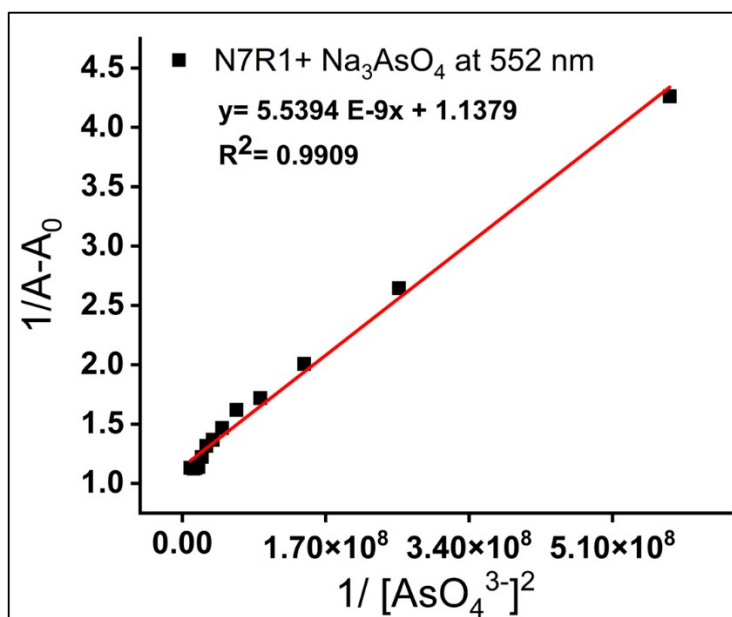

Fig. S13 B-H plot for N7R1–AsO<sub>4</sub><sup>3-</sup> complex in DMSO/H<sub>2</sub>O (9:1, v/v).

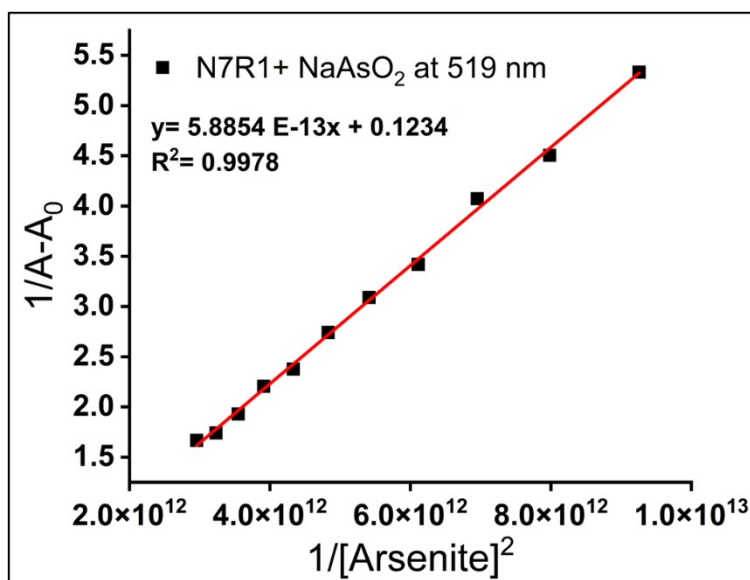

Fig. S14 B-H plot for N7R1–AsO<sub>2</sub><sup>-</sup> complex in DMSO/H<sub>2</sub>O (7:3, v/v).

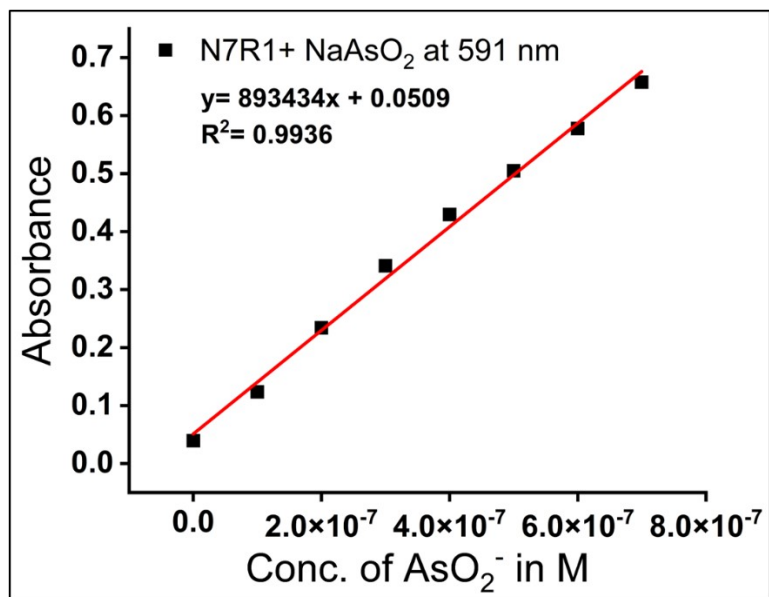

**Fig. S15** Calibration curve for N7R1–AsO<sub>2</sub><sup>-</sup> complex in DMSO/H<sub>2</sub>O (9:1, v/v)

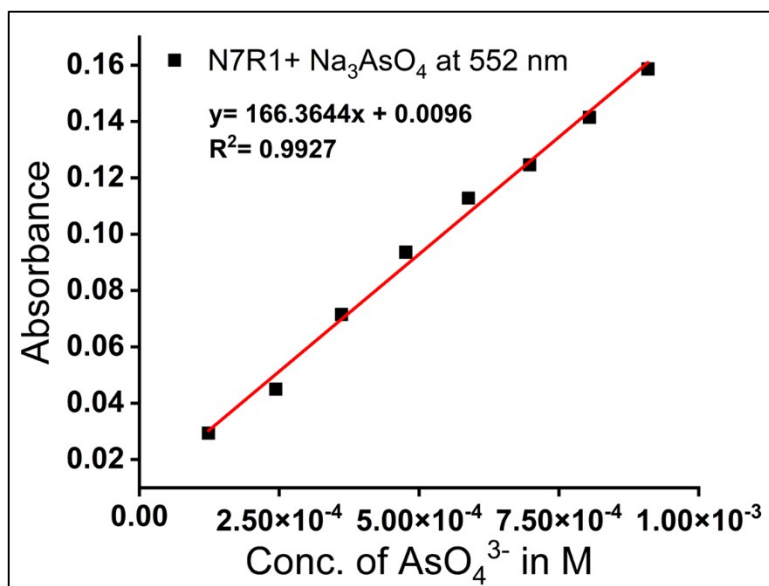

**Fig. S16** Calibration curve for N7R1–AsO<sub>4</sub><sup>3-</sup> complex in DMSO/H<sub>2</sub>O (9:1, v/v)

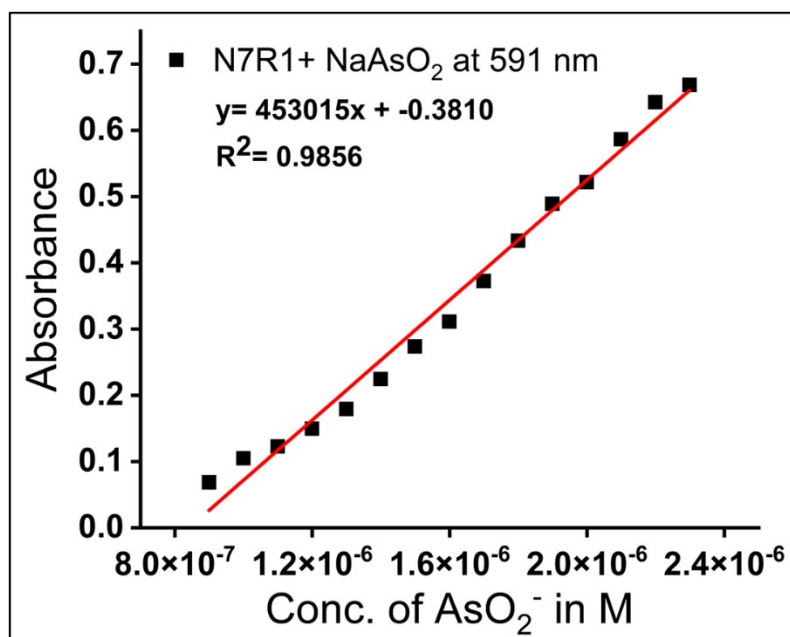

**Fig. S17** Calibration curve for N7R1–AsO<sub>2</sub><sup>-</sup> complex in DMSO/H<sub>2</sub>O (7:3, v/v).

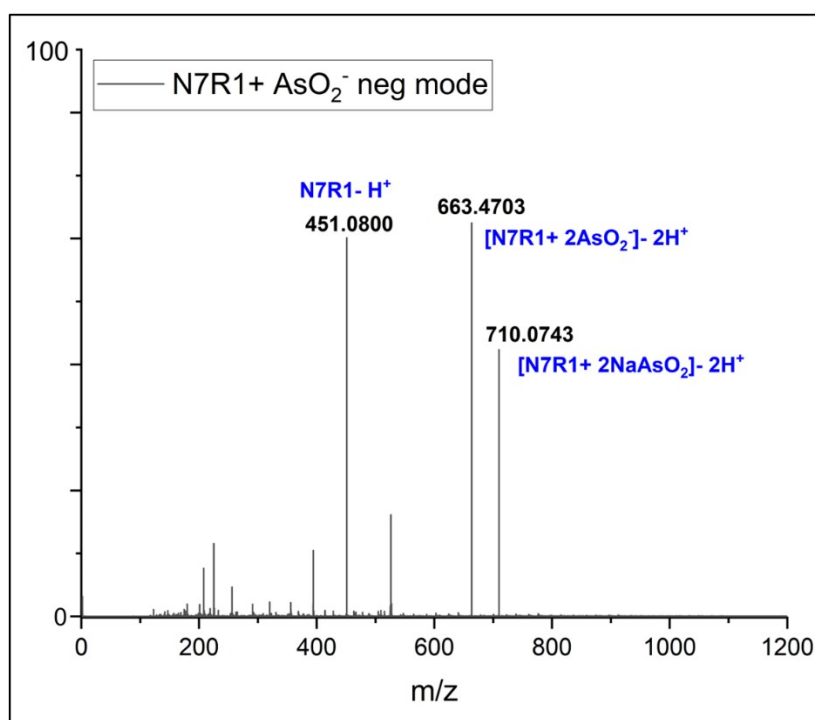

**Fig. S18** LC- MS spectrum of N7R1- AsO<sub>2</sub><sup>-</sup> complex in negative mode.

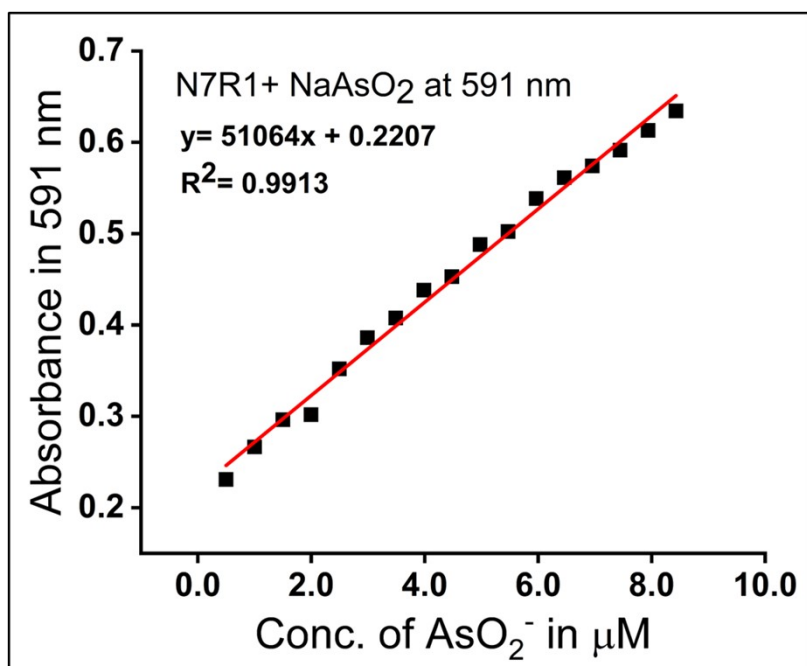

**Fig. S19** A linear calibration plot of N7R1–AsO<sub>2</sub><sup>-</sup> vs. the amount of AsO<sub>2</sub><sup>-</sup> ions for the quantitative analysis of milk, honey and water samples.
